# Supplementary material for: A useful method integrating production and immobilization of recombinant cellulase
Source: Springer Nature journal article supplement (doi:10.1007/s00253-013-5238-6), 2013-09-16
Supplement: 253_2013_5238_MOESM1_ESM.pdf [file 253_2013_5238_MOESM1_ESM.pdf]

Title: A useful method integrating production and immobilization of recombinant cellulase

Journal: Applied Microbiology and Biotechnology

Chung-Jen Chiang<sup>1</sup>, Po Ting Chen<sup>2</sup>, Chien Yu Yeh<sup>3</sup>, Zei Wen Wang<sup>3</sup> and  
Yun-Peng Chao<sup>3,4,5\*</sup>

<sup>1</sup> Department of Medical Laboratory Science and Biotechnology, China Medical University, No. 91, Hsueh-Shih Road, Taichung 40402, Taiwan

<sup>2</sup>Department of Biotechnology, Southern Taiwan University of Science and Technology, No. 1, Nantai St., Tainan 71005, Taiwan

<sup>3</sup>Department of Chemical Engineering, Feng Chia University, 100 Wen-Hwa Road, Taichung 40724, Taiwan

<sup>4</sup>Department of Health and Nutrition Biotechnology, Asia University, Taichung 41354, Taiwan

<sup>5</sup>Department of Medical Research, China Medical University Hospital, Taichung 40447, Taiwan

\*Correspondence should be addressed to:

Dr. Yun-Peng Chao

E-mail: ypchao@fcu.edu.tw

TEL: 886-4-24517250 ext. 3677

Fax: 886-4-24510890

Table S1: Optimization of the assembly condition for AOBs assembled with CelA-Ole and Ole-CelK by the Box-Behnken design.

| Trial | Coded levels ( $X_1 = A/K$ ; $X_2 = \text{pH}$ ; $X_3 = \text{Temperature}$ ) |       |       | Actual levels |       |       | Response: enzyme activity (U/mg) |
|-------|-------------------------------------------------------------------------------|-------|-------|---------------|-------|-------|----------------------------------|
|       | $X_1$                                                                         | $X_2$ | $X_3$ | $X_1$         | $X_2$ | $X_3$ |                                  |
| 1     | 0                                                                             | -1    | +1    | 0.5           | 4     | 40    | 1.13                             |
| 2     | +1                                                                            | -1    | 0     | 0.9           | 4     | 22    | 0.60                             |
| 3     | -1                                                                            | +1    | 0     | 0.1           | 4     | 22    | 1.15                             |
| 4     | +1                                                                            | +1    | 0     | 0.9           | 10    | 22    | 1.71                             |
| 5     | -1                                                                            | 0     | +1    | 0.1           | 7     | 40    | 2.38                             |
| 6     | 0                                                                             | -1    | -1    | 0.5           | 4     | 4     | 1.02                             |
| 7     | 0                                                                             | 0     | 0     | 0.5           | 7     | 22    | 2.96                             |
| 8     | +1                                                                            | 0     | -1    | 0.9           | 7     | 4     | 2.93                             |
| 9     | -1                                                                            | 0     | -1    | 0.1           | 7     | 4     | 2.53                             |
| 10    | 0                                                                             | 0     | 0     | 0.5           | 7     | 22    | 2.92                             |
| 11    | 0                                                                             | 0     | 0     | 0.5           | 7     | 22    | 3.04                             |
| 12    | +1                                                                            | 0     | +1    | 0.9           | 7     | 40    | 2.83                             |
| 13    | 0                                                                             | +1    | -1    | 0.5           | 10    | 4     | 2.15                             |
| 14    | -1                                                                            | +1    | 0     | 0.1           | 10    | 22    | 1.85                             |
| 15    | 0                                                                             | +1    | +1    | 0.5           | 10    | 40    | 1.61                             |

\* CelA-Ole plus Ole-CelK in cell pellets was 200  $\mu\text{g}$  in total for assembly of AOBs. The target proteins (50  $\mu\text{g}$  in total) involved in AOBs were utilized to determine the enzyme activity.

Table S2. Result of ANOVA for the Box-Behnken design.

| Factor           | Parameter estimate | Standard error | <i>P</i> -value |
|------------------|--------------------|----------------|-----------------|
| $X_1$            | 0.021              | 0.102          | 0.842           |
| $X_2$            | 0.429              | 0.102          | 0.008           |
| $X_3$            | -0.086             | 0.102          | 0.435           |
| $X_1 \times X_2$ | 0.104              | 0.144          | 0.501           |
| $X_1 \times X_3$ | 0.011              | 0.144          | 0.940           |
| $X_2 \times X_3$ | -0.164             | 0.144          | 0.306           |
| $X_1 \times X_1$ | -0.281             | 0.150          | 0.119           |
| $X_2 \times X_2$ | -1.470             | 0.150          | 0.0002          |
| $X_3 \times X_3$ | -0.129             | 0.150          | 0.429           |

Table S3: Optimization of the assembly condition for AOBs assembled with CelA-Ole, Ole-CelK, and Ole-Gls by the Box-Behnken design.

| Trial | Coded levels ( $X_1 = \text{G/AK}$ ;<br>$X_2 = \text{pH}$ ; $X_3 = \text{temperature}$ ) |       |       | Actual levels |       |       | Response:<br>enzyme activity<br>(g/l-h) |
|-------|------------------------------------------------------------------------------------------|-------|-------|---------------|-------|-------|-----------------------------------------|
|       | $X_1$                                                                                    | $X_2$ | $X_3$ | $X_1$         | $X_2$ | $X_3$ |                                         |
| 1     | +1                                                                                       | 0     | -1    | 4             | 6.5   | 20    | 0.24                                    |
| 2     | 0                                                                                        | +1    | +1    | 2.5           | 8     | 40    | 0.17                                    |
| 3     | -1                                                                                       | 0     | -1    | 1             | 6.5   | 20    | 0.22                                    |
| 4     | 0                                                                                        | -1    | -1    | 2.5           | 5     | 20    | 0.24                                    |
| 5     | 0                                                                                        | -1    | +1    | 2.5           | 5     | 40    | 0.25                                    |
| 6     | +1                                                                                       | -1    | 0     | 4             | 5     | 30    | 0.22                                    |
| 7     | 0                                                                                        | +1    | -1    | 2.5           | 8     | 20    | 0.17                                    |
| 8     | +1                                                                                       | +1    | 0     | 4             | 8     | 30    | 0.16                                    |
| 9     | -1                                                                                       | -1    | 0     | 1             | 5     | 30    | 0.23                                    |
| 10    | 0                                                                                        | 0     | 0     | 2.5           | 6.5   | 30    | 0.26                                    |
| 11    | 0                                                                                        | 0     | 0     | 2.5           | 6.5   | 30    | 0.26                                    |
| 12    | 0                                                                                        | 0     | 0     | 2.5           | 6.5   | 30    | 0.27                                    |
| 13    | -1                                                                                       | 0     | +1    | 1             | 6.5   | 40    | 0.23                                    |
| 14    | -1                                                                                       | +1    | 0     | 1             | 8     | 30    | 0.20                                    |
| 15    | +1                                                                                       | 0     | +1    | 4             | 6.5   | 40    | 0.24                                    |

\* CelA-Ole, Ole-CelK, and Ole-Gls in cell pellets was 200  $\mu\text{g}$  in total for assembly of AOBs. The target proteins (50  $\mu\text{g}$  in total) involved in AOBs were utilized to determine the enzyme activity.

Table S4. Result of ANOVA for the Box-Behnken design.

| Factor           | Parameter estimate | Standard error | <i>P</i> -value |
|------------------|--------------------|----------------|-----------------|
| $X_1$            | -0.0025            | 0.0057         | 0.6812          |
| $X_2$            | -0.0300            | 0.0057         | 0.0034          |
| $X_3$            | 0.0025             | 0.0057         | 0.6812          |
| $X_1 \times X_2$ | -0.0075            | 0.0081         | 0.3977          |
| $X_1 \times X_3$ | -0.0025            | 0.0081         | 0.7704          |
| $X_2 \times X_3$ | -0.0025            | 0.0081         | 0.7704          |
| $X_1 \times X_1$ | -0.0179            | 0.0084         | 0.0873          |
| $X_2 \times X_2$ | -0.0429            | 0.0084         | 0.0038          |
| $X_3 \times X_3$ | -0.0129            | 0.0084         | 0.1867          |

Table S5. Optimization of the reaction condition for AOBs-bound cellulase using the CCD method.

| Trial | Coded levels<br>( $Z_1 = \text{pH}$ ; $Z_2 = \text{temperature}$ ) |       | Actual levels |                              | Response: enzyme activity (g/l-h) |
|-------|--------------------------------------------------------------------|-------|---------------|------------------------------|-----------------------------------|
|       | $Z_1$                                                              | $Z_2$ | $Z_1$         | $Z_2$ ( $^{\circ}\text{C}$ ) |                                   |
| 1     | 0                                                                  | -0.75 | 6             | 46                           | 0.10                              |
| 2     | 0                                                                  | 0     | 6             | 60                           | 0.32                              |
| 3     | -0.75                                                              | 0     | 4.6           | 60                           | 0.015                             |
| 4     | 0                                                                  | 0     | 6             | 60                           | 0.34                              |
| 5     | +1                                                                 | +1    | 7             | 70                           | 0.29                              |
| 6     | -1                                                                 | +1    | 5             | 70                           | 0.27                              |
| 7     | 0                                                                  | 0     | 6             | 60                           | 0.34                              |
| 8     | +1                                                                 | -1    | 7             | 50                           | 0.14                              |
| 9     | 0                                                                  | 0     | 6             | 60                           | 0.34                              |
| 10    | 0                                                                  | 0     | 6             | 60                           | 0.34                              |
| 11    | 0                                                                  | +1.1  | 6             | 74                           | 0.31                              |
| 12    | -1                                                                 | -1    | 5             | 50                           | 0.18                              |
| 13    | +1.1                                                               | 0     | 7.4           | 60                           | 0.22                              |

Table S6. Result of ANOVA for the CCD method.

| Factor           | Parameter estimate | Standard error | $P$ -value |
|------------------|--------------------|----------------|------------|
| $Z_1$            | 0.0337             | 0.0187         | 0.1146     |
| $Z_2$            | 0.0671             | 0.0187         | 0.0089     |
| $Z_1 \times Z_2$ | 0.0150             | 0.0265         | 0.5888     |
| $Z_1 \times Z_1$ | -0.0946            | 0.0201         | 0.0022     |
| $Z_2 \times Z_2$ | -0.0508            | 0.0201         | 0.0392     |
